# Supplementary material for: The Poetics of Physics
Source: Preprints.org preprint supplement (doi:10.20944/preprints202211.0038.v1), 2022-11-02
Supplement: Supplementary file 2 [file supplementary]

**The University of Surrey Ion Beam Centre**

*An EPSRC supported National Facility*

## **The Ion Beam Analysis Laboratory**

**Report on  $\alpha$  decay of two lead book pages**

**For Matthew Hood, Jordan Codices Group**

**G469, Job ##4405, 4475**

**23<sup>rd</sup> August 2016, C. Jeynes**

(minor revision to Figure on p.2 16<sup>th</sup> September)

## ***Samples and Purpose of Analysis***

Weathered lead from a Roman site in Dorset obtained from Matthew Hood (see email 3<sup>rd</sup> June) which can be confidently dated (old!) is counted (#4405). Also RBS data is obtained to verify that the sample is lead to the surface. This is to verify that old lead does not count.

Two closed codices of six sheets each (#4475) were opened on 1<sup>st</sup> July with Jean-Claude Bragard, and David & Jennifer Elkington (also with Roger Webb and the photographer) present. One is known as the “Shovak” codex (see email from Matthew Hood, MH, 30<sup>th</sup> June) and the other is a codex from the Jordanian Department of Antiquities. We will call this the “JDA codex”.

The JDA codex was described by J-CB in an email to CJ of 15<sup>th</sup> June 2016, and MH subsequently (5<sup>th</sup> August) sent me a copy of an authorisation letter to “Mr & Mrs Elkington” from the Prof. Ziad al Saad of the Jordanian Department of Antiquities dated 21<sup>st</sup> April 2011.

## ***Results***

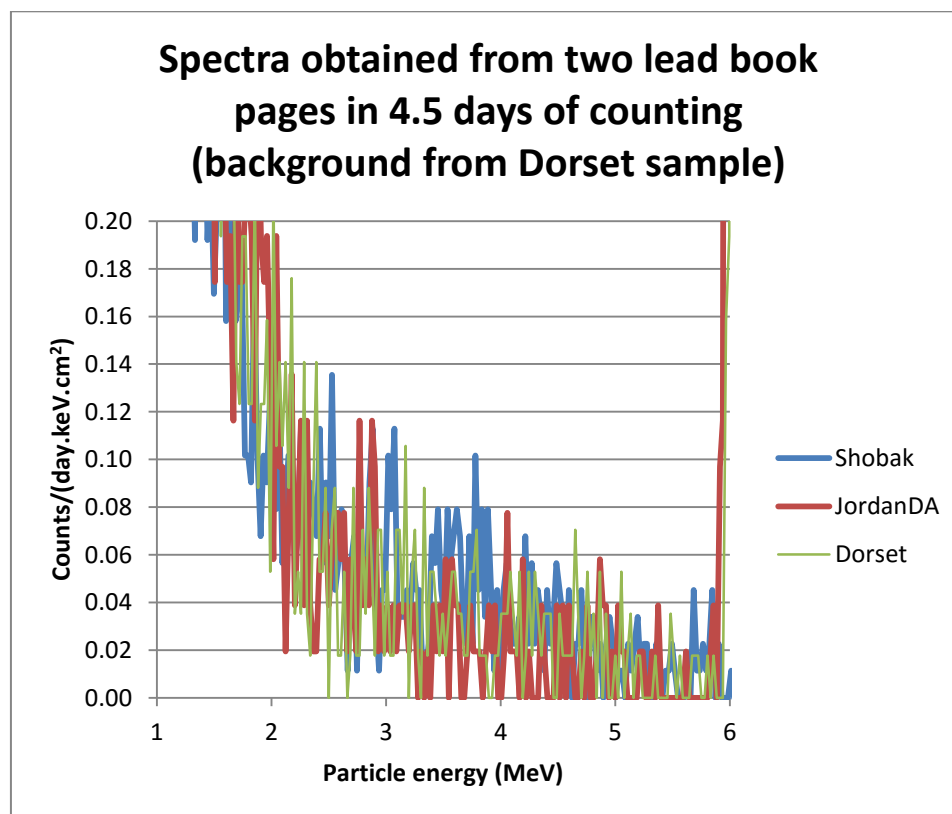

The Figure shows the normalised counts from both samples. We are looking for a signal with a high energy edge at 5.3 MeV. This appears not to be present.

## ***Conclusions***

All samples appear to be equivalent (older than we can measure)

***Results (7<sup>th</sup> June)***

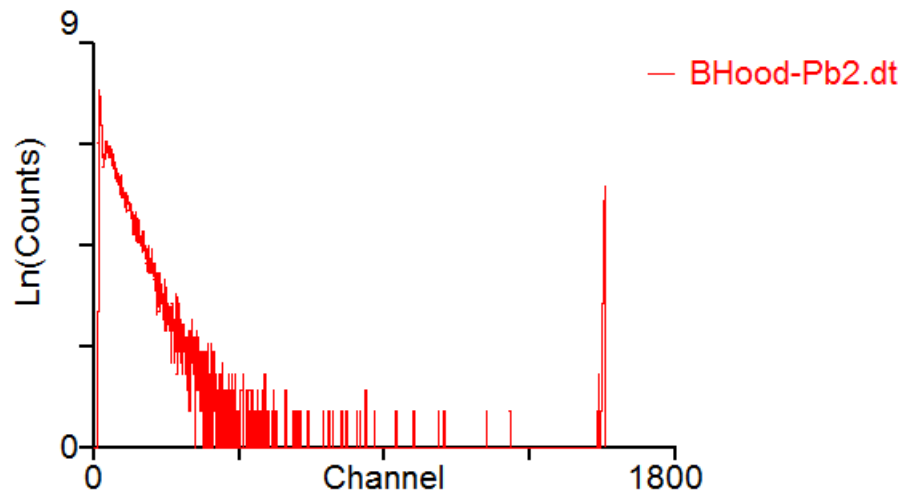

***Results (and analytical conditions) (15<sup>th</sup> June)***

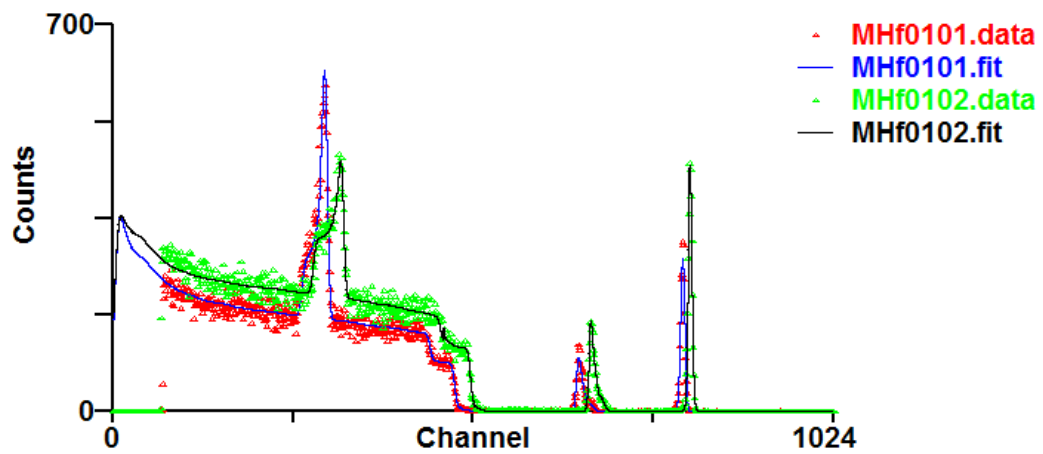

Calibration sample (Au/Ni/SiO<sub>2</sub>/Si). 3039 keV: detA, detB had gains of 3.40, 3.36 keV/channel

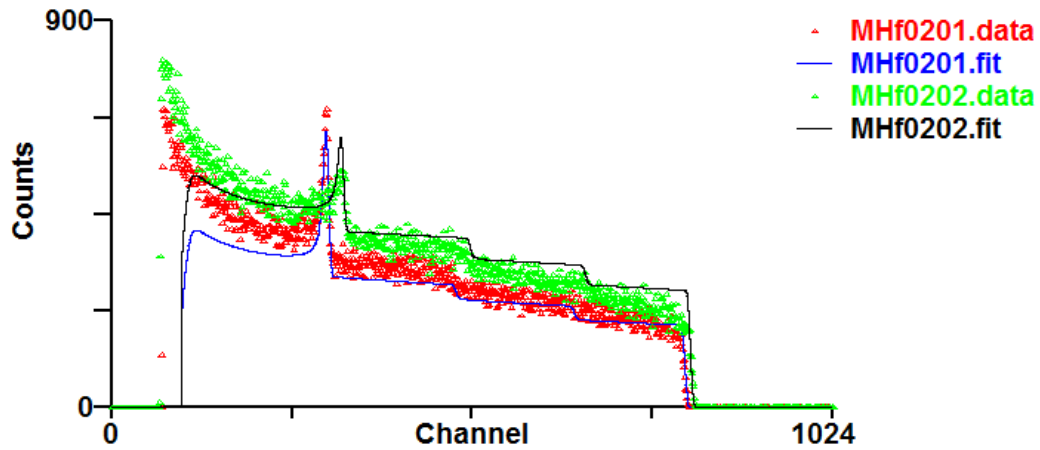

This is the Roman lead from Dorset with 3039 keV He. Fitted with (these numbers are only approximate!): 30at%  $\text{Fe}_2\text{O}_3$ , 66at%  $\text{SiO}_2$ , 4% Pb. There is lead to the surface, but significantly attenuated.

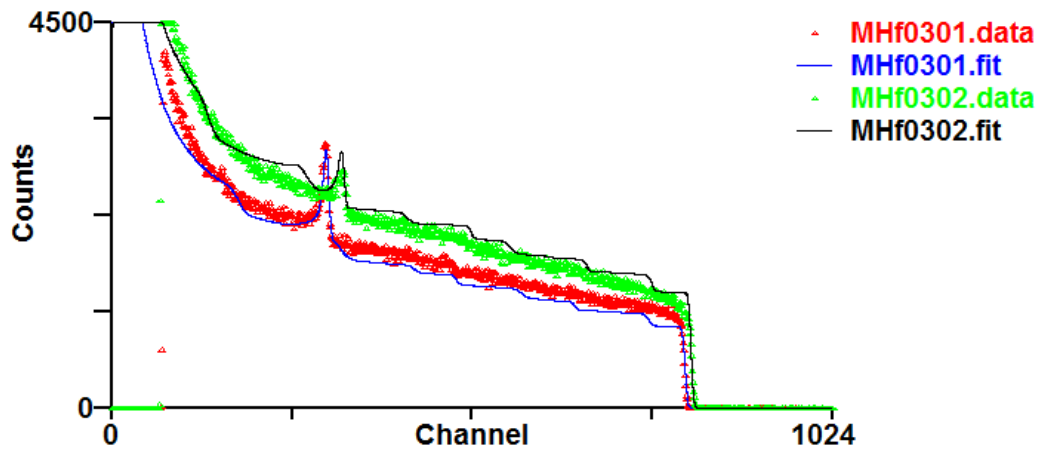

As before, another area. This is similar but the thickness of the mineralised layer is different.

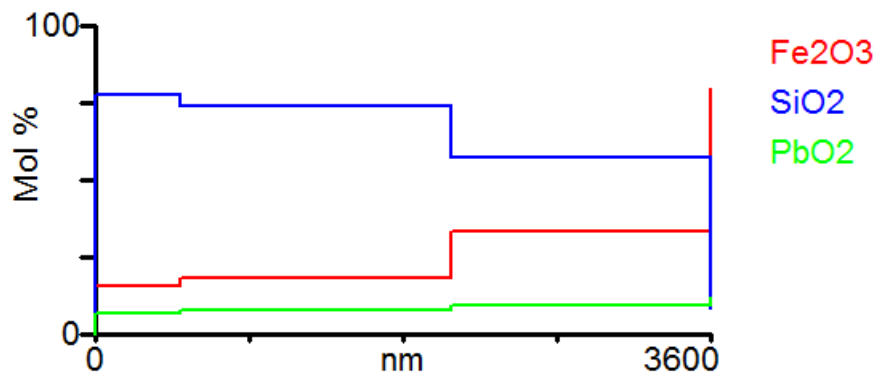

This is the structure used for fitting: it just gives an indication of the composition (mostly silicates, with other components).

### ***Results (1<sup>st</sup> July)***

Page 6 of the Shovak codex is placed in front of the A detector (aperture 70.9 mm<sup>2</sup>).

Page 6 of the JDA codex is placed in front of the B detector (aperture 41.8 mm<sup>2</sup>).

Detection channels A, B had gains of 3.40, 3.36 keV/channel.

We counted for 396688 secs (4.6 days). This time was obtained from the pulser signal.

The collected spectra for the Devon piece, and the Shovak and JordanDA codices were compressed to 256 channels (see spreadsheet) but not smoothed.
