# Supplementary material for: The Poetics of Physics
Source: Preprints.org preprint supplement (doi:10.20944/preprints202211.0038.v1), 2022-11-02
Supplement: Supplementary file 5 [file supplementary]

# Supplementary Materials Index: Read-Me

## The Poetry of Physics

C.Jeynes, 24<sup>th</sup> October 2022

The main paper (*The Poetry of Physics*) includes poems in *Palikur* (an autochthonous Amazonian language), *Hebrew* (classical Hebrew probably from over two millennia ago, probably remembering pre-Homeric times), and *Italian* (by Dante Alighieri; three stanzas from the *Divina Commedia*, Canto II). There are also extended quotes from great writers in German, post-classical Latin and Alexandrian Greek. Audio files are provided for:

1. **ku wown biyuke-2020.m4a**; Poem in *Palikur* (Epigraph) read by the author, Aldiere Orlando. The opening sentence is: “*Ay pahat nopsesa iwit adahan wis ivegminene uhiyakemni amin wownavrik awaygyi ku aysaw in kote biyukte*” (“Here is a brief word to encourage us to think about the value of our language before we lose it.”)
2. **HebrewMnemonicPoem.opus**; Poem in *classical Hebrew* (Section §5) read by [רם זייצ'ק] (Ram Zajicek). The (voiced) text is given explicitly in **HebrewPoem-4Feb2021.pdf**.
3. **Genesis1,26-WA0005.opus**; Phrase from the Masoretic Text in *classical Hebrew* (quoted near the start of Section §5) read by [רם זייצ'ק] (Ram Zajicek). The (voiced) text is given explicitly in **Genesis1,26-22Apr2021.png**.
4. **Dante-20210215\_103247.mp4**; Poem in mediaeval Italian (§4.4) read by Silvia Calusi.

Aldiere Orlando's poem takes as its model a famous poem, “*Ihcuac thalhtolli ye miqui*” in *Náhuatl* (an autochthonous Mexican language) by Miguel León-Portilla. The *Palikur* poem is translated into Portuguese and English, and the *Náhuatl* poem with its Spanish and English translations are all given:

5. **If our language is lost x3.pdf**; *Palikur* and *Náhuatl* poems with their Portuguese, Spanish and English translations. Note that the English of the *Náhuatl* poem is a translation of the Spanish.

The *Appendix* to the main paper is referred to multiple times in the Paper, notably in Section §5 (Figures 1,2; Table 1 and other places). It elaborates the philosophical reasoning behind the Christian interpretation of the Hebrew poem (mnemonic) constructed in Table 1 of the Main Paper, with extensive references to Christian canonical texts (which include the Masoretic Text of the Hebrew Scriptures).

6. **PoeticsAppendix\_v9-Feb2021.pdf**; (Barker & Jeynes) Philosophical justification of the English interpretation of the palaeo-Hebrew mnemonic shown in Table 1 of the Main Paper.

The Appendix also refers to two laboratory Reports from the University of Surrey Ion Beam Centre:

7. **LeadComposition-PIXEreport2012.pdf**; X-ray spectrometry determination of minor elements in the lead Page. Trace elements are hard to detect in Pb without special methods, not used here since the lead provenance was not the interest of the analysis. A known modern lead control sample had detectable Cr, quite a lot of Cu, some other transition metals, but no detectable Sn, Sb. The sample under test had no Cr but quite a lot of everything else. The report of the presence of small amounts of “Hg” is a measurement artefact.
8. **LeadMeasurements-July16.pdf**; alpha spectrometry determination of the age of the lead in the lead Page using the  $^{210}\text{Pb}$  isotope method. This Report shows only the raw data: the interpretation in the Appendix concludes that the lead is certainly older than 1950 (excluding modern forgeries subsequent to the discovery of the Dead Sea Scrolls which created a market for these forgeries).

Finally, transparency demands that the versions submitted to *Studies in the History & Philosophy of Science* in 2021 and to *Synthese* in 2022, together with the Referees’ Reports and our responses to them, also be included.

9. **SHPS-D-21-00402.pdf**; submission to *Studies in the History & Philosophy of Science* (11<sup>th</sup> October 2021). This PDF includes includes the Cover Letter to the Editor.
10. **Response2Reviewers-CoverLetter-SHPS.docx**; (13<sup>th</sup> November 2021) Cover Letter to the Editor for the Response document (#11).
11. **Response2Reviewers.docx**; responds to two Reviews of the paper submitted to *SHPS*, where both Reviews are included in their entirety.
12. **SYNT-D-22-00001.pdf**; revised submission to *Synthese* (3<sup>rd</sup> January 2022). This PDF includes the important Appendix, and also the two IBC Reports (2012 and 2016). It also includes both the Palikur and Náhuatl poems with their Portuguese and Spanish translations (and the translation into English), and the voiced Hebrew (MT) text both of Genesis 1:27 and of the Hebrew poem reconstructed from the mnemonic in the Menorah Page.
13. **Response2SyntheseReviewer.docx**; (26<sup>th</sup> February 2022) responds to the single Review of the revised paper submitted to *Synthese* (there are no Cover Letters for this journal). The Review is included in its entirety in the Response document.
