# Supplementary material for: The Poetics of Physics
Source: Preprints.org preprint supplement (doi:10.20944/preprints202211.0038.v1), 2022-11-02
Supplement: Supplementary file 6 [file supplementary]

**The University of Surrey Ion Beam Centre**

*An EPSRC supported National Facility*

## **The Ion Beam Analysis Laboratory**

**Report on the composition of two Pb samples**

**For Roger Webb, IBC**

**G469, Job No. 3172**

**22<sup>nd</sup> May 2012, C.Jeynes & G.W.Grime**

## ***Samples and Purpose of Analysis***

Samples arrived 18<sup>th</sup> May 2012 from Roger Webb. One sample may be from the Jordan Codices (??), the other is a convenient "modern" control sample; we are looking for characterisation, both with 5 MeV alphas from  $^{210}\text{Pb}$  disintegration and from trace element analysis using PIXE. The PIXE is reported here.

## ***Conclusions***

Large amounts of Sb and Sn are detected in the "old" sample, with strongly enhanced transition metal content and heavy chloridation of the surface. For more details see the Appendix.

## ***Analysis***

Data were collected using OMDAQ, and fitted with WiNDF. The particle detector was not used.

NDFv9.3e was used to fit the data (N. P. Barradas and C. Jeynes, "Advanced physics & algorithms in the IBA DataFurnace", *Nucl. Instrum Methods Phys. Res., Sect. B*, **266** (2008) 1875-1879).

## ***Results***

(For experimental setup and detailed results and discussion, please refer to the Appendix).

## APPENDIX

### Depth Profiling by Ion Beam Analysis

This work was done using a 2MV Tandetron accelerator from High Voltage Engineering Europe, commissioned summer 2002 at the University of Surrey Ion Beam Centre. This machine is capable of generating proton beams up to 4MeV and alpha particle beams of up to 6MeV ([Simon et al: Nucl.Instrum.Methods 2004: B219-220, 405](#))

Rutherford backscattering spectrometry (RBS) is an accurate, powerful and general thin film depth profiling technique typically carried out with 2 MeV He beams. Higher energy and proton beams are typically used for depth profiling thicker films, and for enhancing sensitivity to light elements with non-Rutherford elastic backscattering (EBS). Hydrogen can be depth profiled using elastic forward recoil spectrometry (FRS, also known as ERD: elastic recoil detection). Deuterium can also be depth profiled using nuclear reaction analysis (NRA) with a  $^3\text{He}$  beam. Particle induced X-ray emission (PIXE) has little depth resolution but can unambiguously identify elements and analyse for trace elements with detection limits approaching  $\mu\text{g/g}$ . Particle induced gamma-ray emission (PIGE) is a form of NRA particularly valuable for lighter elements present in bulk materials at a trace level: F, Na, Al, Si.

*The depth profiling beamline* is equipped with a 6-movement goniometer from Arun Microelectronics Ltd, commissioned autumn 2002. This instrument is capable of loading entire 100mm wafers through a load lock, of channelling in arbitrary directions on a single crystal, and of high depth resolution (glancing beam incidence geometry). Both backscattering and forward recoil detectors are fitted. The target chamber has a base vacuum below 1 nbar.

*The microbeam beamline* was commissioned summer 2002. It has a magnetic quadrupole triplet lens and associated equipment from Oxford Microbeams Ltd, and can focus the beam to about 1 micron. The beam can be scanned over about 2mm giving trace and minor element mapping with PIXE and 3D depth profiling with RBS/EBS using the OMDAC and DAN32 software ([Grime & Dawson, Nucl.Instrum.Methods 1995: B104, 107](#)) which is based on the GUPIX code ([Blaauw, Campbell et al, Nucl.Instrum.Methods 2002. B189, 113](#)) Various sample stages are available including a cold stage, a goniometer, and a stage suitable for ion beam induced current (IBIC).

*The external beamline* was commissioned May 2004 and also has a magnetic quadrupole triplet with a thin window so that a focussed and scanned ion beam can be passed into air to analyse large, delicate or wet samples by PIXE, RBS/EBS and PIGE.

*Depth profiles* can be extracted automatically from RBS, EBS, ERD and NRA spectra using the Surrey IBA DataFurnace software ([Jeynes et al J.Phys.D, 2003: 36, R97, \[www.surreyibc.ac.uk/ndf\]\(http://www.surreyibc.ac.uk/ndf\)](#)). We have validated the accuracy of this code against a certified standard sample ([Boudreault et al Surf. Interface Anal. 2002: 33, 478](#)). The code is also validated by an international intercomparison ([Barradas et al Nucl.Instrum.Methods 2008: B266, 1338](#)). DataFurnace v9 ([Barradas & Jeynes Nucl.Instrum.Methods 2008: B266, 1875](#)), can also now handle PIXE data (with other IBA data) self-consistently ([Pascual-Izarra et al, Nucl. Instrum.Methods 2007: B261, 426](#)) and more correctly than GUPIX.

Where the DataFurnace fit is *good* the fitted profile is *valid* (but not necessarily true!). In the analyses we will point out the limitations of the results due to counting statistics, finite energy and depth resolution, and other systematic errors. Profiles are always given as layer structures. We systematically use *Occam's Razor* ("minimise your assumptions") to be objective about how much information is really in the data: in particular the extracted layer structures tend to be as *coarse* as the data will allow, and the discontinuous profiles we always show are due to the finite energy and depth resolution of the technique and can be seen as an expression of these.

Complete data sets are archived and can be re-analysed on request. In particular, a rigorous statistical evaluation of the uncertainty of the depth profiles can be obtained with the Bayesian techniques natural to the DataFurnace implementation. We have an interest in accurate work with rigorous evaluation of uncertainties, and are always interested in joint publication.

Dr.Chris Jeynes, University of Surrey Ion Beam Centre Guildford, GU2 7XH

c.jeynes@surrey.ac.uk: [www.surreyibc.ac.uk](http://www.surreyibc.ac.uk)

tel: 01483 689829 (Mrs.Karen Arthur: 01483 686090)

July 2009

### ***Samples and Purpose of Analysis***

Samples arrived 18<sup>th</sup> May 2012 from Roger Webb. One sample may be from the Jordan Codices (??), the other is a convenient "modern" control sample; we are looking for characterisation, both with 5 MeV alphas from  $^{210}\text{Pb}$  disintegration and from trace element analysis using PIXE. The PIXE is reported here.

### ***Analytical Conditions***

2.530 MeV  $^1\text{H}^+$ , 21<sup>st</sup> May 2012. Beam current was ~500 pA, nominal beam size 2 $\mu\text{m}$ .

The PIXE detector was at 45° to the beam in the IBM geometry. It had a filter of 130  $\mu\text{m}$  Be.

Beam incident in a near-normal direction.

## Results

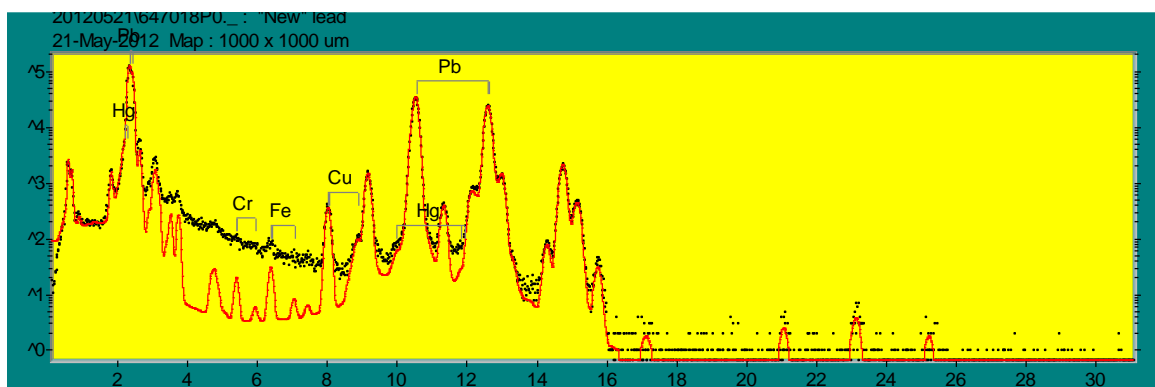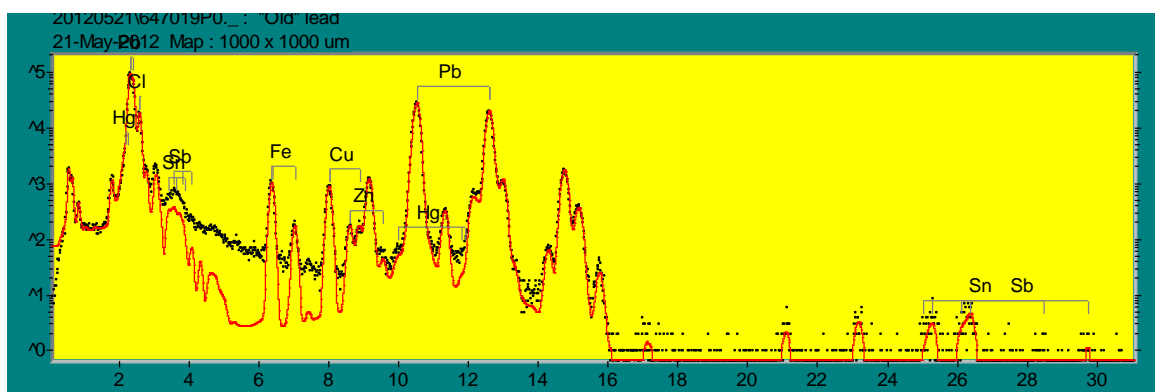

New lead

"Old" lead, full area

"Old" lead, selected area

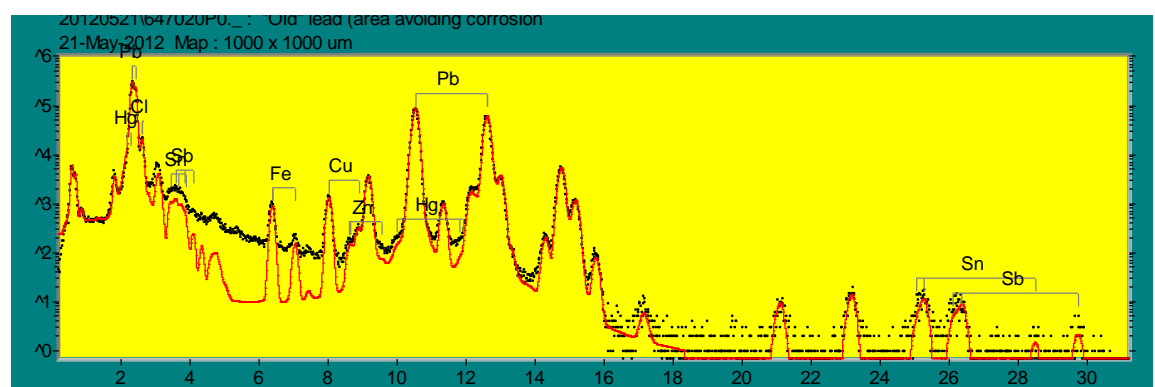

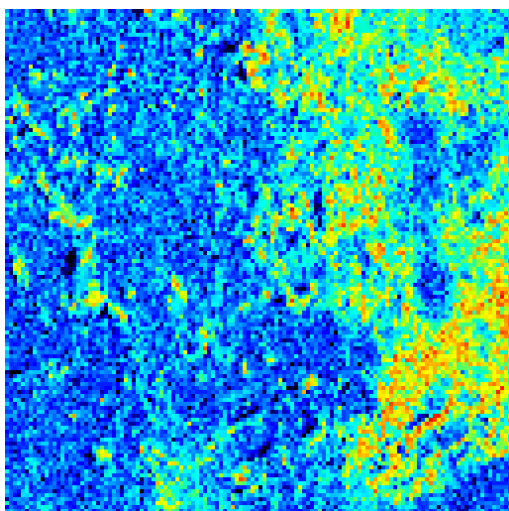

Map of Cl signal: "Old" lead, full area

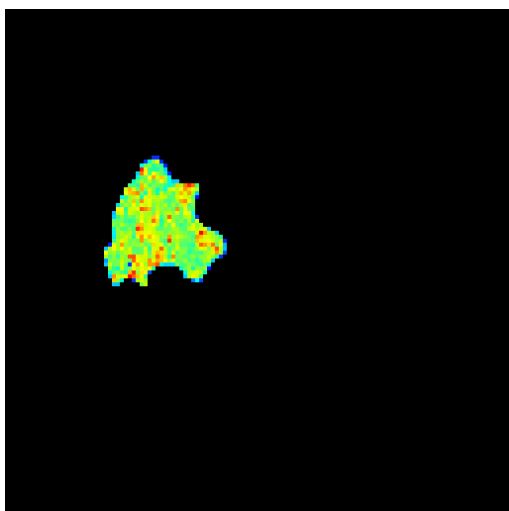

Map of Cl signal: "Old" lead, selected area

**Table 1: Quantitative composition of lead samples**

| Sample     | Parts per million (atomic) |       |       |      |      |      |     |        |
|------------|----------------------------|-------|-------|------|------|------|-----|--------|
|            | Cr                         | Fe    | Cu    | Zn   | Sn   | Sb   | Hg  | Pb     |
| "New" lead | 212                        | 377   | 6017  | 114  | 0    | 0    | 452 | 992830 |
| "Old" lead | 0                          | 12695 | 14284 | 2921 | 3256 | 3760 | 433 | 962652 |
| "Old" lead | 0                          | 5225  | 9726  | 887  | 4454 | 5899 | 438 | 973372 |

  

| Sample     | Uncertainties (ppm atomic) |     |     |    |     |     |     |      |
|------------|----------------------------|-----|-----|----|-----|-----|-----|------|
|            | Cr                         | Fe  | Cu  | Zn | Sn  | Sb  | Hg  | Pb   |
| "New" lead | 87                         | 79  | 144 | 78 |     |     | 131 | 1986 |
| "Old" lead |                            | 178 | 200 |    | 326 | 376 | 121 | 2888 |
| "Old" lead |                            | 89  | 117 | 63 | 223 | 295 | 96  | 1947 |

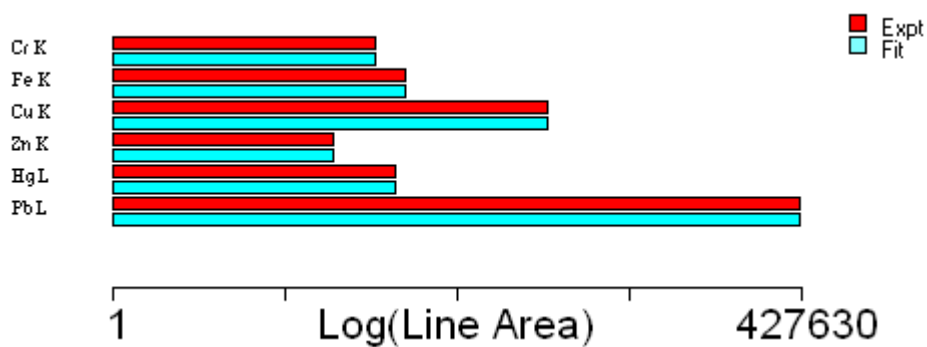

Sample#18: "New" lead

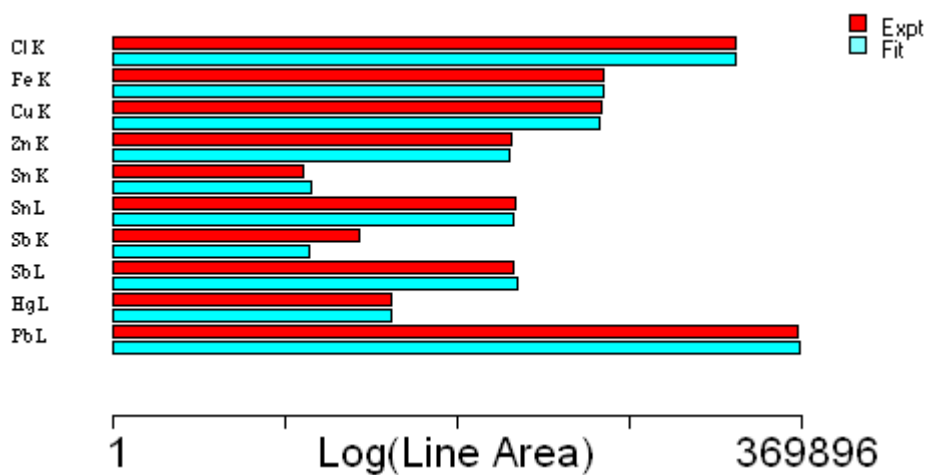

Sample#19: "Old" lead

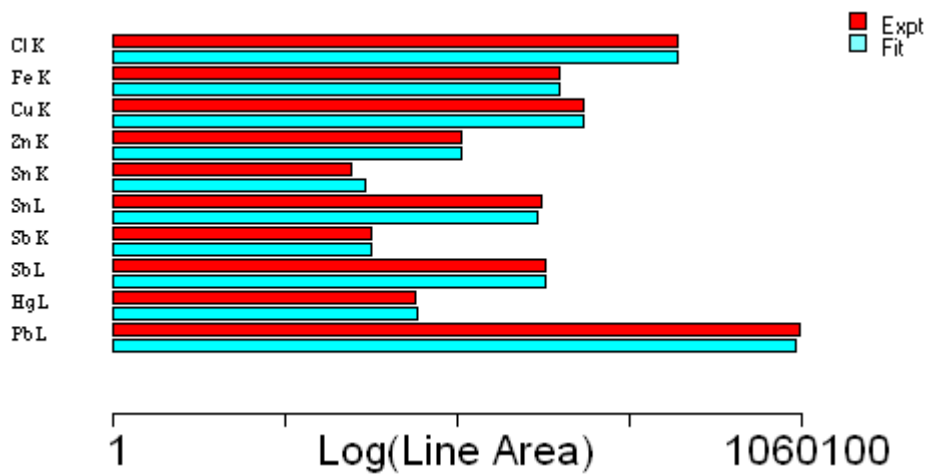

Sample#20: "Old" lead

## Conclusions

The fits to the data are good, so the confidence is good.

There appears to be a fixed "Hg" signal associated with the Pb: perhaps this is an extra line excited by the proton beam?

The corrosion products on the surface of the "Old" lead sample are associated with chlorine, with enough Cl to give 42 nm equivalent thickness on average in the analysed area. Note that the quantity of Cl is very non-uniform and thus it will be much thicker in some areas.

The "Old" and "New" lead samples are quite different, with the "Old" sample having 0.1at% Zn and significant quantities of Sb and Sn. The corrosion products (chlorides) on the "Old" sample probably contain lots of transition metals (Fe, Cu, Zn) since these are reduced in the selected area. Note that the heavy metals (Sn, Sb) are *increased* in the selected area, as expected from extra absorption in the L lines (not much weight is given to the K lines which have a very high statistical uncertainty).

**Table 2: Quantitative composition of lead samples**

| Sample                     | NaCl<br>equiv.<br>thickness | Parts per million (atomic) |       |      |      |      |     |        |
|----------------------------|-----------------------------|----------------------------|-------|------|------|------|-----|--------|
|                            | nm                          | Fe                         | Cu    | Zn   | Sn   | Sb   | Hg  | Pb     |
| "New" lead                 | 0                           | 377                        | 6017  | 114  | 0    | 0    | 452 | 992830 |
| "Old" lead                 | 42                          | 12695                      | 14284 | 2921 | 3256 | 3760 | 433 | 962652 |
| "Old" lead (selected area) | 25                          | 5225                       | 9726  | 887  | 4454 | 5899 | 438 | 973372 |

  

| Sample                     | Uncertainties (ppm atomic) |     |    |     |     |     |      |
|----------------------------|----------------------------|-----|----|-----|-----|-----|------|
|                            | Fe                         | Cu  | Zn | Sn  | Sb  | Hg  | Pb   |
| "New" lead                 | 79                         | 144 | 78 |     |     | 131 | 1986 |
| "Old" lead                 | 178                        | 200 |    | 326 | 376 | 121 | 2888 |
| "Old" lead (selected area) | 89                         | 117 | 63 | 223 | 295 | 96  | 1947 |
