# Supplementary material for: The Poetics of Physics
Source: Preprints.org preprint supplement (doi:10.20944/preprints202211.0038.v1), 2022-11-02
Supplement: Supplementary file 7 [file supplementary]

תָּמִיד מְדַת דְּמוּתוֹ

יָשֵׁב בְּצָבָא לְבוּשׁ בְּצִי

יוֹשֵׁעַ שְׂעֵי עֵצִי

יֵצֵן צָצִי צָצִי

יֵעֵן עֵצִי שְׂעֵעִי

הַנֶּשֶׁב שָׁבַח בְּצָחִיחַ

הַנֶּשֶׁעַ שְׂעָה עֵצָה

הַנֶּעֵן עָצָה שְׂעָה

הַנֶּעֱבַ עָבָה בְּעָה

אָעוּב עָבִי בְּעִי

תָּמִיד מְדַת הַדְּמוּת
