# Supplementary material for: The Poetics of Physics
Source: Preprints.org preprint supplement (doi:10.20944/preprints202211.0038.v1), 2022-11-02
Supplement: Supplementary file 8 [file supplementary]

## Ku wown biyuke

Ku wown biyuke  
nikwe ukannuhwan amin madikte  
ariknebdí inurikyene,  
(warukma, kamuw, kayg)  
hawata ukannuhwan umin wis amadgaya inin,  
(uhiyakemni akak uwakemni)  
in ka akkaka akisyavriknama akiw  
ewka awen wownavrik.

Ku wown biyuke  
nikwe madikte amadgaya inin,  
(parahwokwa, warik, puwiknebdí akak ahavwi)  
in ka kinetihwaka nimin akiw,  
akak uhiyakemni payak akak uwegewni  
mmanawa in kuwis menwe.

Ku wown biyuke  
in ke wotbe pahayku lapot sabukwiyebe.  
Nikwe hiyeg amedgenevwi inin  
awetuvye pukuha  
ku samah wowskawniy ay amadga inin.

Ku wown biyuke,  
unetni adah kiyathaki akak amnihka  
unetni adah kayahka akak batekka  
wavan, westwa, unetni, uviryepkawni,  
amekenegben gikehnikis  
in ka kinetihwakati nimin akiw.

Ku wown biyuke  
— aa, ka aynsima iwit kuwis biyuke,  
ka aynsima iwit biyuknene akiw, kewa  
pahak waruwbe bekbetepka aritnanyuvwi  
nikwe wahawkrivwiy gikuvimnakis  
tinwohawsepka adah avavyekwa  
in ke igiskabe ku pariye wis biyukse  
adah avavyekwa.

© Aldiere Orlando, 2016

## Se perdermos a nossa língua

Se perdermos a nossa língua,  
então todo o nosso conhecimento  
das coisas que estão acima no céu  
(estrelas, sol e lua)  
e das pessoas que vivem na terra (nossos  
pensamentos e sentimentos mais profundos)  
não será mais expressado da forma adequada  
se perdermos a nossa língua.

Se perdermos a nossa língua,  
então tudo no mundo  
(mares e rios, animais e plantas)  
nunca mais será articulado  
com nossa sabedoria e nossas percepções  
pois elas já teriam desaparecido.

Se perdermos a nossa língua,  
Será como uma porta que se fechará para sempre  
para os povos do mundo  
que nunca entenderiam  
como nós vivíamos aqui na terra.

Se perdermos a nossa língua,  
nossas palavras de respeito e amor,  
nossas expressões de dor ou felicidade,  
nossas canções, nossas histórias, nossas preces,  
as realizações dos nossos antepassados  
nunca mais serão contadas.

Se perdermos a nossa língua  
— e muitas línguas já foram perdidas  
e muitas já estão desaparecendo,  
como espelhos quebrados em pedacinhos —  
as vozes dos nossos antepassados então  
serão dessa vez silenciadas para sempre  
e perderíamos uma grande riqueza  
para todo o sempre.

Tradução de Simoni Valadares e Diana Green

## If our language is lost

If our language is lost  
then all our knowledge  
of things above  
(stars, sun, and moon)  
and our knowledge us humans on earth  
(our thoughts and our deepest feelings)  
will not be properly expressed again  
when our language is gone.

If our language is lost  
then everything in the world,  
(seas and rivers, animals and plants)  
may never again be spoken  
with our understanding and insights  
for these will have already vanished.

If our language is lost  
it will be as though a door were closed  
to the peoples of the world  
and they will never understand  
how we lived here on earth.

If our language is lost  
our words of respect and love,  
our expressions of pain or fondness  
our songs, our stories, our prayers,  
the accomplishments of our ancestors  
will never be spoken of again.

If our language is lost  
(Oh, many languages are already lost  
and many more are almost lost,  
like mirrors forever shattered)  
then our ancestors' voices will be  
silenced forever and ever  
and a great treasure will be  
forever lost to us.

Translated by Diana Green

## Ihcuac thalhtolli ye miqui

Ihcuac tlahtolli ye miqui  
mochi in teoyotl,  
cicitlaltin, tonatiuh ihuan metztli;  
mochi in tlacayotl,  
neyolnonotzaliztli ihuan huelicamatiliztli,  
ayocmo neci  
inon tezcapan.

Ihcuac tlahtolli ye miqui,  
mochi tlamantli in cemanahuac,  
teoatl, atoyatl,  
yolcame, cuauhtin ihuan xihuitl  
ayocmo nemililoh, ayocmo tenehualoh,  
tlachializtica ihuan caquiliztica  
ayocmo nemih.

Inhuac tlahtolli ye miqui,  
cemihcac motzacuah  
nohuian altepepan  
in tlanexillotl, in quixohuayan.  
In ye tlamahuizolo  
occetica  
in mochi mani ihuan yoli in tlalticpac.

Ihcuac tlahtolli ye miqui,  
itlazohticatlahtol,  
mehualizeltmiliztli ihuan tetlazotlaliztli,  
ahzo huehneh cuicatl,  
ahnozo tlahtolli, tlatlauhtiliztli,  
amaca, in yuh ocatcah,  
hueliz occepa quintenquixtiz.

Ihcuac tlahtolli ye miqui,  
occequintin ye omiqueh  
ihuan miec huel miquizqueh.  
Tezcatl maniz puztecqui,  
netzatzililiztli icehuallo  
cemihcac necahualoh:  
totlacayo motolinia.

## Cuando muere una lengua

Cuando muere una lengua  
las cosas divinas,  
estrellas, sol y luna;  
las cosas humanas,  
pensar y sentir,  
no se reflejan ya  
en ese espejo.

Cuando muere una lengua  
todo lo que hay en el mundo,  
mares y ríos,  
animales y plantas,  
ni se piensan, ni pronuncian  
con atisbos y sonidos  
que no existen ya.

Cuando muere una lengua  
entonces se cierra  
a todos los pueblos del mundo  
una ventana, una puerta,  
un asomarse  
de modo distinto  
a cuanto es ser y vida en la tierra.

Cuando muere una lengua,  
sus palabras de amor,  
entonación de dolor y querencia,  
tal vez viejos cantos,  
relatos, discursos, plegarias,  
nadie, cual fueron,  
alcanzará a repetir.

Cuando muere una lengua,  
ya muchas han muerto  
y muchas pueden morir.  
Espejos para siempre quebrados,  
sombra de voces  
para siempre acalladas:  
la humanidad se empobrece.

## When a tongue dies

When a tongue dies  
things of heaven,  
sun moon and stars;  
the thoughts and fears  
of humanity  
are no more reflected  
in that mirror.

When a tongue dies  
all that is in the world,  
seas and rivers,  
animals and plants,  
can be neither thought nor said  
since both sight and sound  
are no more.

When a tongue dies  
then is shut  
to all the world  
a window, a door,  
a glimpse, a peek  
a different sight  
of what lives, has being on earth.

When a tongue dies,  
its words of love,  
songs of pain and longing,  
lays of old,  
old tales, speeches, prayers,  
no longer may anyone say,  
whomsoever they may be.

When a tongue dies,  
and many will have died  
and many will die.  
Mirrors forever cracked,  
the murmur of voices  
forever silenced:  
impoverishing all people
